# Supplementary material for: An enhanced heat transfer method based on the electrocapillary effect of gallium-based liquid metal
Source: Royal Society of Chemistry journal article supplement (doi:10.1039/d4lc00791c), 2024-01-01
Supplement: d4lc00791c4.pdf [file d4lc00791c4.pdf]

## Supplementary Materials

### An enhanced heat transfer method based on the electrocapillary effect of gallium-based liquid metal

Liyu Dai,<sup>a</sup> Xiaomin Wu,<sup>\*a</sup> Yiqing Guo,<sup>a</sup> Huimin Hou,<sup>a,b</sup> Zhifeng Hu,<sup>c</sup> Yukai Lin,<sup>a</sup> and Zhiping Yuan<sup>\*d</sup>

<sup>a</sup>Key Laboratory for Thermal Science and Power Engineering of Ministry of Education, Department of Energy and Power Engineering, Tsinghua University, Beijing 100084, China

<sup>b</sup>Qingdao Haier Smart Technology R&D Co., Ltd., 266102, China

<sup>c</sup>Research Center of Solar Power and Refrigeration, School of Mechanical and Engineering, Shanghai Jiao Tong University, Shanghai 200240, China

<sup>d</sup>Department of Energy and Power Engineering, School of Mechanical Engineering, Beijing Institute of Technology, Beijing 100081, China

\*Corresponding author emails: wuxiaomin@mail.tsinghua.edu.cn (X.M. Wu)

nikolatesal@bit.edu.cn (Z. Yuan)

#### S1 Experimental system

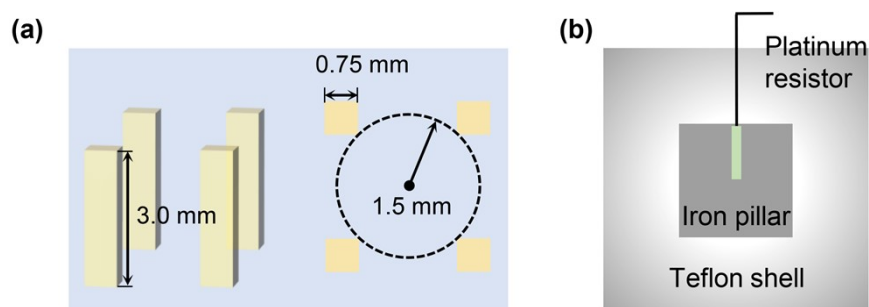

**Fig. S1** (a) The structure and size of pillars; (b) Schematic diagram of the position of iron pillars, Teflon sleeves, and platinum resistors.

#### S2 Experimental data processing

Fig. S2(a) shows the experimental images taken by a high-speed camera. The experimental images are superimposed using Matlab to obtain the trajectories of the graphite particles as shown in Fig.

S2(b).

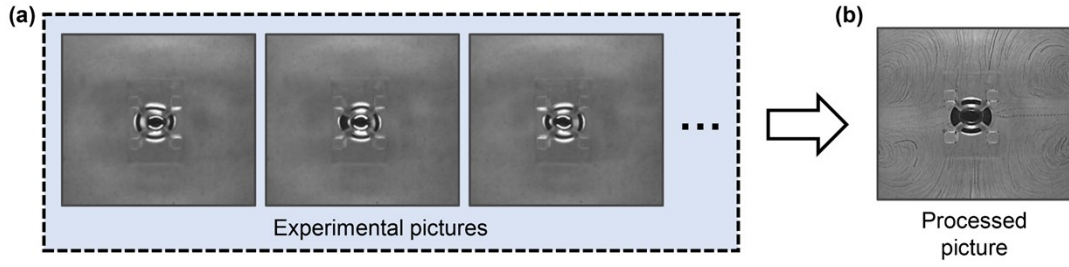

**Fig. S2** (a) Experimental image; (b) Processed image.

### S3 Heat flow calculation for natural convection process

The heat transfer coefficient  $h$  between the solution and the metal surface and the air during natural convection is approximately  $5\sim 25 \text{ W}/(\text{m}^2\cdot\text{K})$ , Take the maximum value of  $25 \text{ W}/(\text{m}^2\cdot\text{K})$  when estimating. From Newton's cooling equation, we know that the heat flow  $Q_{s-a}$  between the solution and the air is

$$Q_{s-a} = A_{s-a} h \Delta T_{s-a} = 0.0004 \times 25 \times 7 = 0.07 \text{ W} \quad \backslash * \text{ MERGEFORMAT (1)}$$

where  $A_{s-a}$  is the contact area between the solution and the air, and  $\Delta T_{s-a}$  is the temperature difference between the solution and the air, which is approximately  $7^\circ\text{C}$ .

The heat flow  $Q_{e-a}$  between the metal surface and the air is

$$\begin{aligned} Q_{e-a} &= A_{e-a-1} h \Delta T_{e-a-1} + A_{e-a-2} h \Delta T_{e-a-2} = A_{e-a-1} h (\Delta T_{e-a-1} + \Delta T_{e-a-2}) \backslash * \text{ MERGEFORMAT (2)} \\ &= 0.000365 \times 25 \times (-10 + 20) = 0.09 \text{ W} \end{aligned}$$

where  $A_{e-a-1}$  and  $A_{e-a-2}$  are the contact areas between the hot and cold end electrode plates and the air, respectively;  $\Delta T_{e-a-1}$  and  $\Delta T_{e-a-2}$  are the temperature differences between the hot and cold end electrode plates and the air, respectively, which are approximately  $-10$  and  $20^\circ\text{C}$ . The heat flow transfers to the cold end through the iron pillar:

$$Q = -\lambda_{Fe} A_p \frac{\Delta T_{3-1}}{\Delta x_{3-1}} = -80 \times 0.0004 \times \frac{1.45}{0.02} = 2.3 \text{ W} \quad \backslash * \text{ MERGEFORMAT (3)}$$

where  $\lambda_{Fe}$  is the thermal conductivity of iron,  $A_p$  is the cross-sectional area of the iron pillar,  $\Delta T_{3-1}$  is the temperature difference between position No. 3 and No. 1 in the pillar, and  $\Delta x_{3-1}$  is the distance between two positions No. 3 and No. 1.

### S4 Thermal resistance network diagram of the experimental system

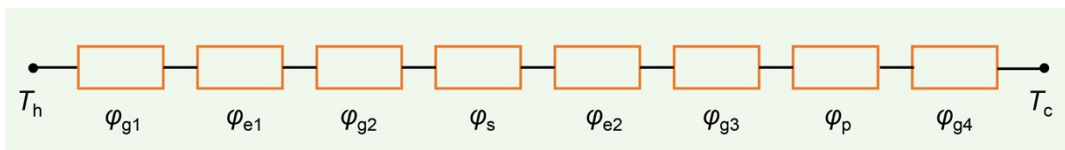

**Fig. S3** The thermal resistance network diagram of the experimental system.  $T_h$  and  $T_c$  are the temperatures of the heating plate and the cooling plate respectively.  $\varphi_{g1} \sim \varphi_{g4}$  are the thermal resistance of thermal grease.  $\varphi_{e1}$  and  $\varphi_{e2}$  are the thermal resistance of the electrode plates.  $\varphi_s$  is the thermal resistance of the solution.  $\varphi_p$  is the thermal resistance of the iron pillar.

## S5 Calculation of the velocity of the solution on the droplet surface

The velocity of the droplet surface is deduced by referring to our previous work.<sup>1</sup> First, the surface tension gradient of the droplet is determined by the potential distribution. For analysis, the solution region is divided into three parts as shown in Fig. S4(a).  $L_1 \sim L_3$  are the lengths of each region, and  $L_1 = L_3$ ,  $L_2 = 2r$ , and the corresponding resistances are  $R_1 \sim R_3$ .  $e$  is the width of the solution region, and  $r$  is the radius of the droplet. Fig. S4(b) is the equivalent circuit of the solution region and the electrode plates,<sup>2, 3</sup> where  $C_{e1}$  and  $C_{e2}$  are the capacitances of the electric double layer (EDL) between the electrode plates and the solution,  $R_{e1}$  and  $R_{e2}$  are the transfer resistance of the charges of the EDL between the electrode plates and the solution.  $V_E$  is the voltage applied to the electrode plates.

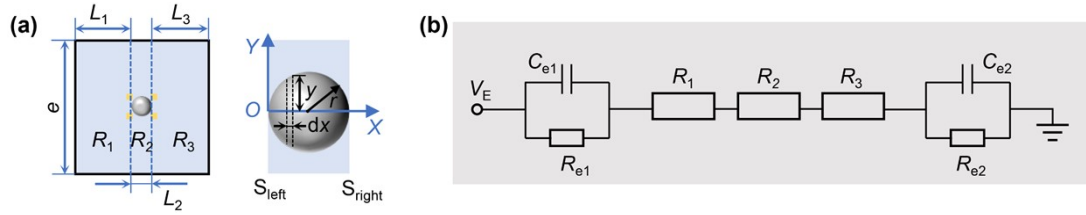

**Fig. S4** (a) The resistance division of the solution region; (b) The equivalent circuit diagram of the solution region and the electrode plates.

The resistance of each solution region is proportional to the length and inversely proportional to the cross-sectional area of the region. When the solution depth is  $d$  and the conductivity is  $\sigma$ , the resistances are:

$$R_1 = R_3 = \frac{L_1}{\sigma e d} = \frac{e - 2r}{2\sigma e d} \quad \backslash * \text{MERGEFORMAT (S4)}$$

For the resistance of the droplet region,  $R_2$ , in Fig.S4, the resistance of the solution between the EGaIn droplet and the channel wall is mainly paid attention to, which only depends on the properties of the solution.  $R_2$  is determined by the integration method:

$$\begin{aligned} R_2 &= \frac{1}{\sigma} \int_0^{2r} \frac{dx}{A_s} = \frac{1}{\sigma} \int_0^{2r} \frac{dx}{ed - \pi [r^2 - (x-r)^2]} \\ &= \frac{2}{\pi\sigma} \sqrt{\frac{\pi}{ed - \pi r^2}} \arctan \left( r \sqrt{\frac{\pi}{ed - \pi r^2}} \right) \end{aligned} \quad \backslash * \text{MERGEFORMAT (S5)}$$

For ease of the expression, denote  $k = \sqrt{\pi / (ed - \pi r^2)}$ , and eqn (S5) is simplified:

$$R_2 = \frac{2k}{\pi\sigma} \arctan(kr) \quad \backslash * \text{MERGEFORMAT (S6)}$$

The resistance of the solution between the tangent planes on the left of the droplet  $S_{\text{left}}$  and the  $x$ -section (i.e.,  $0 \sim x$ ) is:

$$\begin{aligned} R_x &= \frac{1}{\sigma} \int_0^x \frac{dx}{A_s} = \frac{1}{\sigma} \int_0^x \frac{dx}{ed - \pi[r^2 - (x-r)^2]} \quad \backslash * \text{MERGEFORMAT (S7)} \\ &= \frac{k}{\pi\sigma} \left\{ \arctan[k(x-r)] + \arctan(kr) \right\} \end{aligned}$$

where  $A_s$  is the cross-sectional area of the solution. The surface tension  $\gamma$  of the droplet is related to the capacitance  $c$  per unit area of the EDL and the potential difference  $V_{t-x}$  across the EDL:

$$\gamma = \gamma_0 - \frac{1}{2} c V_{t-x}^2 \quad \backslash * \text{MERGEFORMAT (S8)}$$

where  $\gamma_0$  is the surface tension of the droplet when  $V_{t-x}=0$ . The potential difference  $V_{t-x}$  of the EDL of the droplet is the sum of the potential difference  $V_0$  at each point in the original electric double layer of the droplet and the potential difference  $V_x$  of the induced double layer at any position  $x$  on the droplet surface:

$$V_{t-x} = V_0 + V_x \quad \backslash * \text{MERGEFORMAT (S9)}$$

where

$$V_0 = \frac{q_0}{c} \quad \backslash * \text{MERGEFORMAT (S10)}$$

$$V_x = \frac{k \arctan[k(r-x)](V_E - 2V_{RC})}{\pi\sigma(R_1 + R_2 + R_3)} \quad \backslash * \text{MERGEFORMAT (S11)}$$

$q_0$  is the charge density in the original electric double layer of the droplet, and  $V_{RC}$  is the potential difference across the RC circuit.

The shear stress at  $x$  on the surface of the droplet:

$$\tau_x = \frac{\partial \gamma}{\partial x} \quad \backslash * \text{MERGEFORMAT (S12)}$$

Combining eqs (S8) - (S12), eqn (S12) can be written as:

$$\tau_x = \left[ \frac{k \arctan[k(r-x)](V_E - 2V_{RC})}{\pi\sigma(2R_1 + R_2)} + \frac{q_0}{c} \right] \frac{c(V_E - 2V_{RC})}{\sigma(2R_1 + R_2)[ed + \pi x(x-2r)]} \quad \backslash * \text{MERGEFORMAT (S13)}$$

(S13)

Therefore, the flow velocity of the solution with a dynamic viscosity of  $\mu$  at any  $x$  on the droplet surface is:

$$u_x = \frac{\tau_x r}{\mu} = \left[ \frac{k \arctan[k(r-x)](V_E - 2V_{RC})}{\pi\sigma(2R_1 + R_2)} + \frac{q_0}{c} \right] \frac{cr(V_E - 2V_{RC})}{\mu\sigma(2R_1 + R_2)[ed + \pi x(x-2r)]} \quad \backslash * \text{MERGEFORMAT (S14)}$$

(S14)

When the number of droplets is  $n$ ,  $R_2$  can be expressed:

$$\begin{aligned} R_2 &= \frac{1}{\sigma} \int_0^{2r} \frac{dx}{A_s} = \frac{1}{\sigma} \int_0^{2r} \frac{dx}{ed - n\pi[r^2 - (x-r)^2]} \quad \backslash * \text{MERGEFORMAT (S15)} \\ &= \frac{2}{n\pi\sigma} \sqrt{\frac{n\pi}{ed - n\pi r^2}} \arctan\left(r \sqrt{\frac{n\pi}{ed - n\pi r^2}}\right) \end{aligned}$$

Denote  $k' = \sqrt{n\pi / (ed - n\pi r^2)}$ , and eqn (S15) is:

$$R_2 = \frac{2k'}{n\pi\sigma} \arctan(k'r) \quad \backslash * \text{MERGEFORMAT (S16)}$$

$R_x$  is:

$$\begin{aligned} R_x &= \frac{1}{\sigma} \int_0^x \frac{dx}{A_s} = \frac{1}{\sigma} \int_0^x \frac{dx}{ed - n\pi[r^2 - (x-r)^2]} \quad \backslash * \text{MERGEFORMAT (S17)} \\ &= \frac{k'}{n\pi\sigma} \left\{ \arctan[k'(x-r)] + \arctan(k'r) \right\} \end{aligned}$$

Therefore, the velocity of the solution at any position  $x$  on the surface of the droplet is:

$$u_x = \frac{\tau_x r}{\mu} = \left[ \frac{k' \arctan[k'(r-x)](V_E - 2V_{RC})}{n\pi\sigma(2R_1 + R_2)} + \frac{q_0}{c} \right] \frac{cr(V_E - 2V_{RC})}{\mu\sigma(2R_1 + R_2)[ed + n\pi x(x-2r)]} \quad \backslash * \text{MERGEFORMAT (S18)}$$

## S6 Distribution of the temperature of the solution at the final state under the action of two droplets

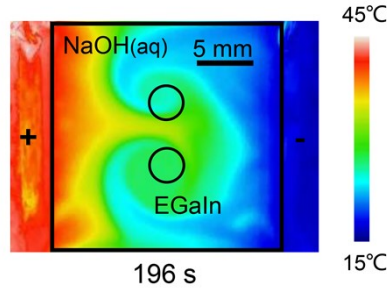

**Fig. S5** The temperature distribution of the solution at the final state under the action of two droplets;  $V_{p-p}=10$  V,  $V_{DC}=5$  V,  $f=100$  Hz.

## References

1. L. Dai, X.M. Wu, H. Hou, Z. Hu, Y. Lin and Z. Yuan, *Lab Chip*, 2024, **24**, 1977-1986.
2. S. Y. Tang, V. Sivan, K. Khoshmanesh, A. P. O'Mullane, X. Tang, B. Gol, N. Eshtiaghi, F. Lieder, P. Petersen, A. Mitchell and K. Kalantar-zadeh, *Nanoscale*, 2013, **5**, 5949-5957.

3. S.-Y. Tang, K. Khoshmanesh, V. Sivan, P. Petersen, A. P. O'Mullane, D. Abbott, A. Mitchell and K. Kalantar-Zadeh, *Proc. Natl. Acad. Sci. U. S. A.*, 2014, **111**, 3304-3309.
